# Supplementary material for: Effects of lower and upper body fatigue in striking response time of amateur karate athletes
Source: PeerJ journal article supplement (doi:10.7717/peerj.14764), 2023-01-31

Figure S1.

Legend:

LB-Punch: Lower body fatigue followed by punch and kick RT, respectively.

LB-Kick: Lower body fatigue followed by kick and punch RT, respectively.

UB-Punch: Upper body fatigue followed by punch and kick RT, respectively.

UB-Kick: Upper body fatigue followed by kick and punch RT, respectively.

A. Mean punch RT and confidence intervals for each experimental condition, stratified by experience level.

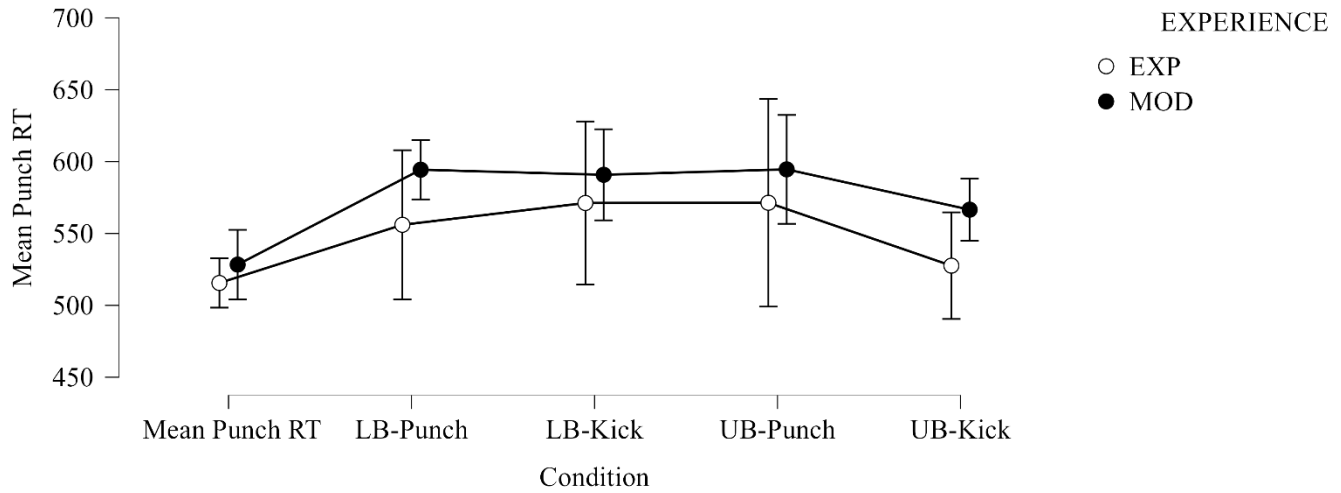

B. Mean punch RT and confidence intervals for each experimental condition, stratified by sex.

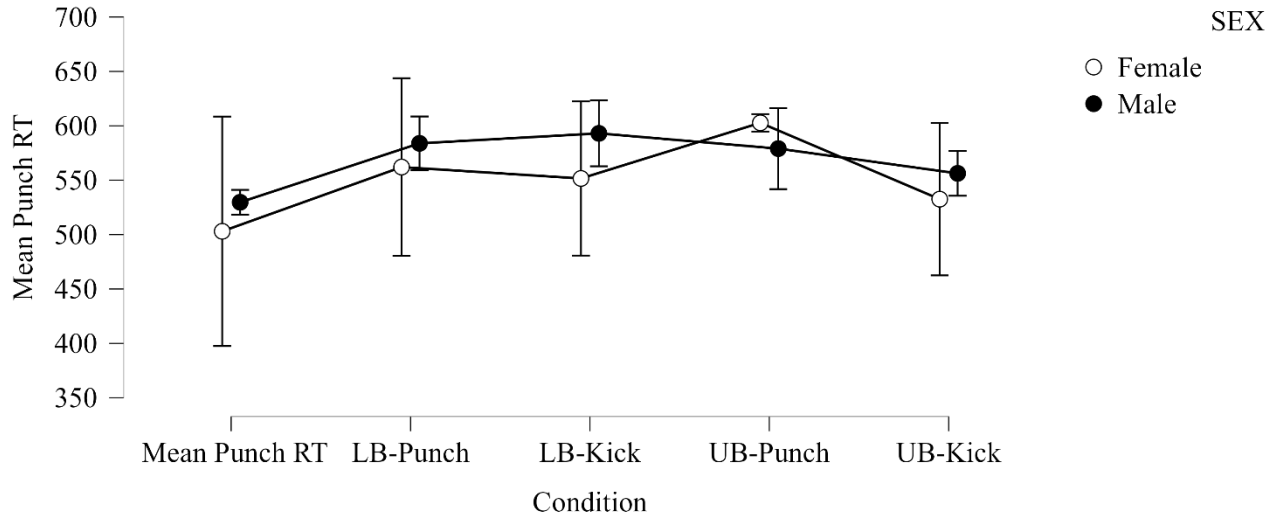

C. Mean kick RT and confidence intervals for each experimental condition, stratified by experience level.

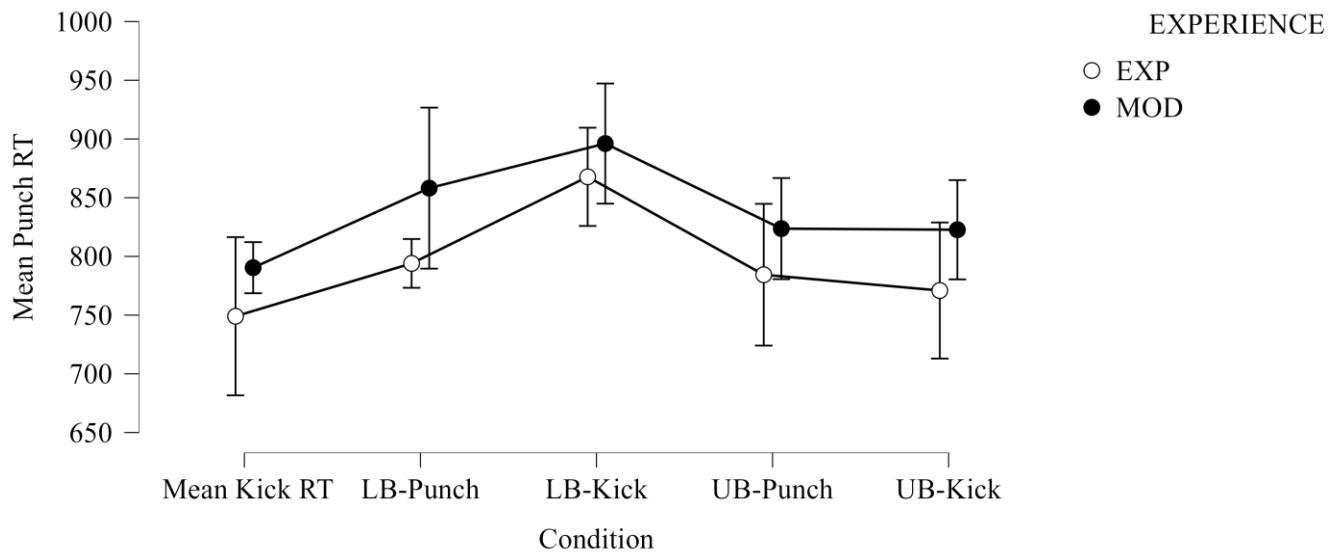

D. Mean punch RT and confidence intervals for each experimental condition, stratified by sex.

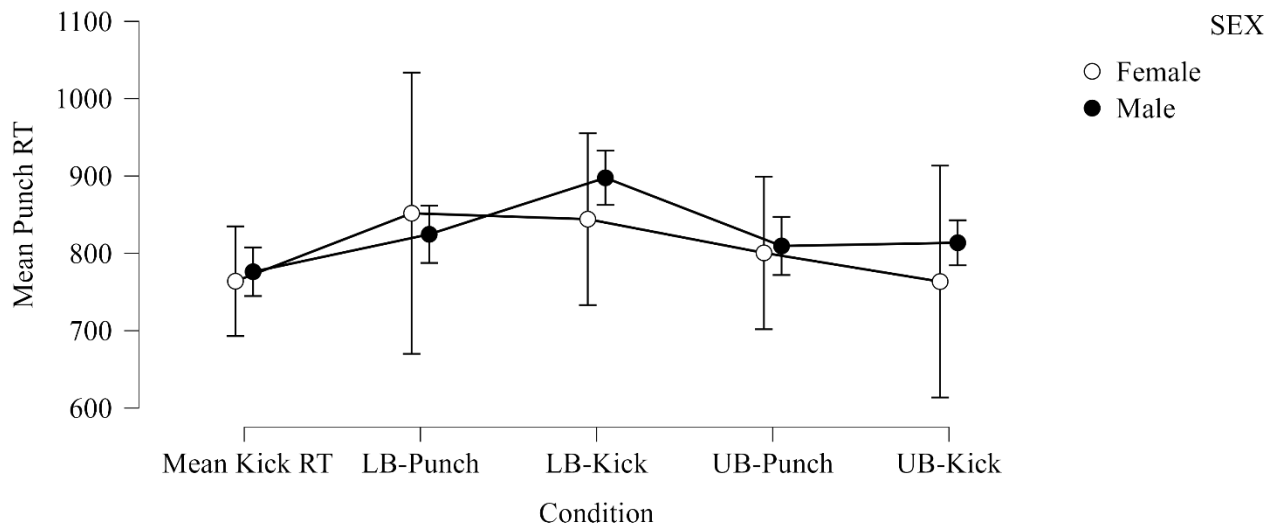

Supplement: Figure_S1.pdf [file Figure_S1.pdf]
